# Supplementary material for: Relationship between the Young’s Moduli of Whole Microcapsules and Their Shell Material Established by Micromanipulation Measurements Based on Diametric Compression between Two Parallel Surfaces and Numerical Modelling
Source: Micromachines (Basel). 2023 Jan 1;14(1):123. doi: 10.3390/mi14010123 (PMC9867421; doi:10.3390/mi14010123)
Supplement: Supplementary file 1 [file micromachines-14-00123-s001.zip › micromachines-2096822-supplementary.pdf]

## Supplementary Material

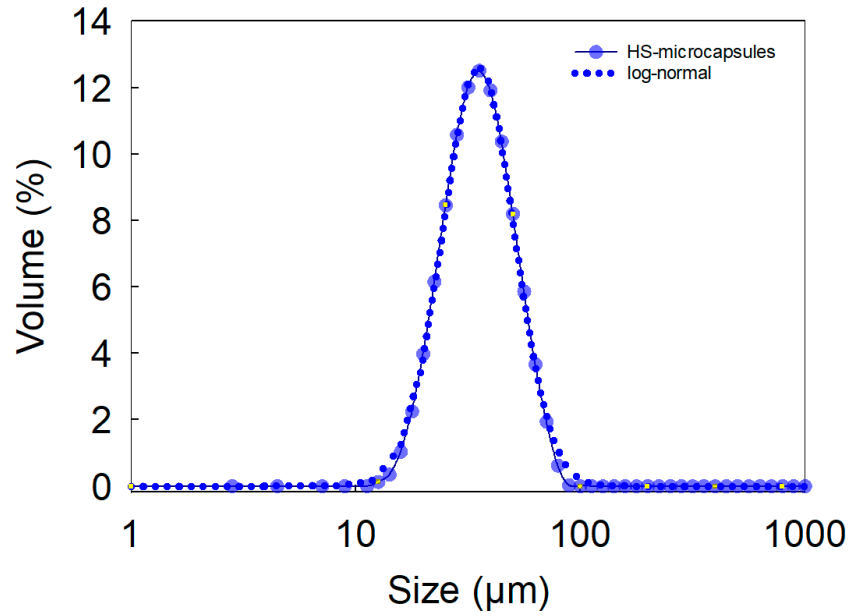

**Figure S1.** Particle Size Distribution of HS laden microcapsules (Master Sizer 2000, Malvern Instruments Ltd, Malvern, UK).

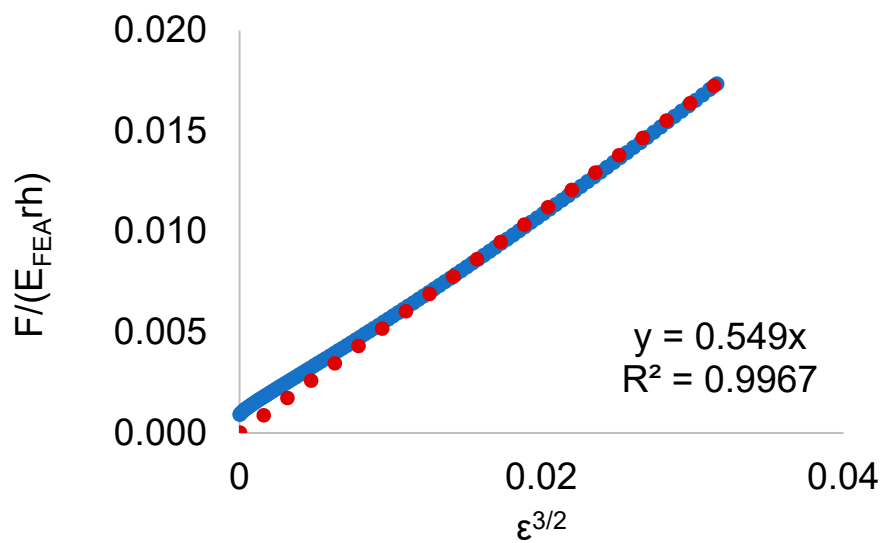

**Figure S2.** The Hertz model fitting results (pink line) of dimensionless force versus fractional deformation up to 10% deformation ( $h/r = 0.05$ , from Figure 5B) where the slope is  $f_4 = 0.549$ .

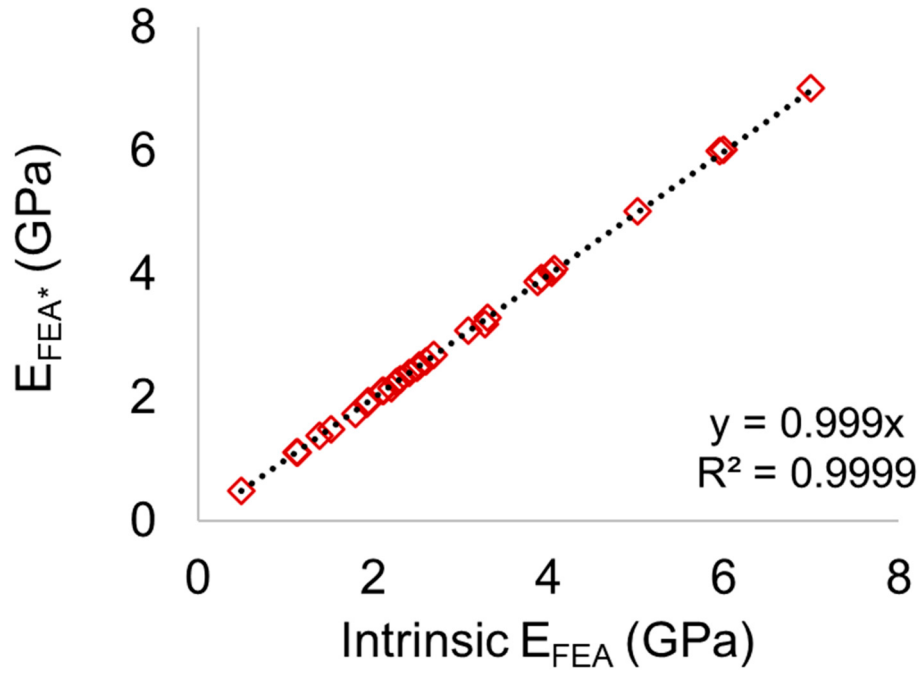

**Figure S3.** Model application example: synthetic microcapsules by Luo, et al. [1]; linear relationship between the FEA derived  $E_{FEA}$  and model  $\varphi$ -predicted Young's modulus  $E_{FEA}^*$ , with their average values of the shell material being  $2.92 \pm 0.29$  GPa and  $2.91 \pm 0.29$  GPa, respectively.

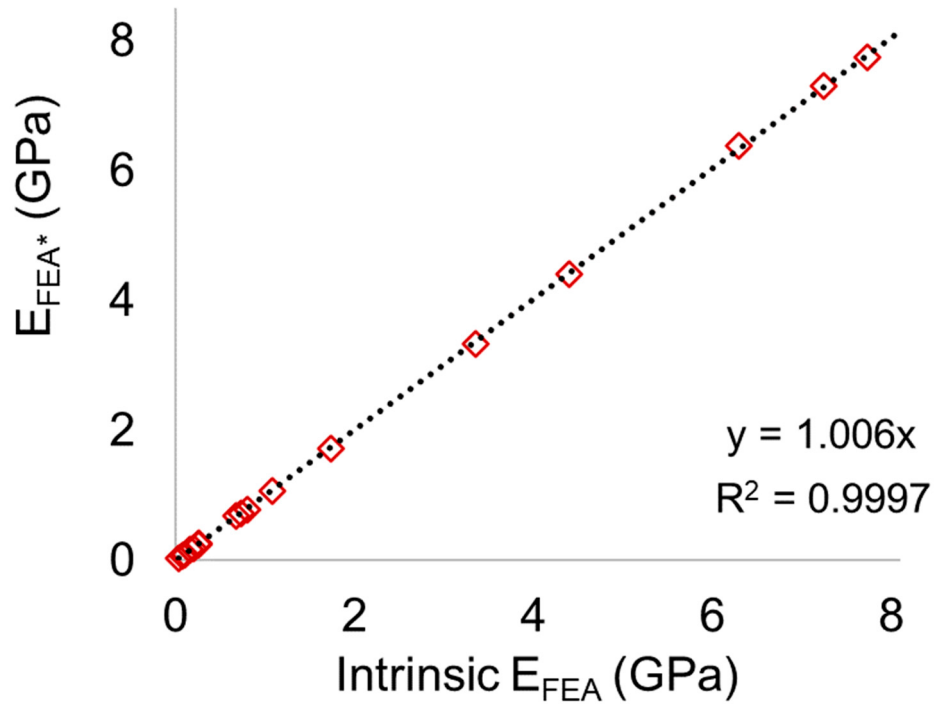

**Figure S4.** Model application example: double coated microcapsules by Baiocco, et al. [2]; linear relationship between the FEA derived  $E_{FEA}$  and model  $\varphi$ -predicted Young's modulus  $E_{FEA}^*$ , with their average values of the shell material being  $2.59 \pm 0.83$  GPa and  $2.61 \pm 0.84$  GPa, respectively.

## References

1. Luo, S.; Gao, M.; Pan, X.; Wang, Y.; He, Y.; Zhu, L.; Si, T.; Sun, Y., Fragrance oil microcapsules with low content of formaldehyde: Preparation and characterization. *Colloids and Surfaces A: Physicochemical and Engineering Aspects* **2022**, 648, 129019.
2. Baiocco, D.; Preece, J. A.; Zhang, Z., Microcapsules with a Fungal Chitosan-gum Arabic-maltodextrin Shell to Encapsulate Health-Beneficial Peppermint Oil. *Food Hydrocolloids for Health* **2021**, 100016.
